# Supplementary material
Source: PubMed Central journal article supplement (PMC5915918)
Supplement: NIHMS948014-supplement-1.pdf [file NIHMS948014-supplement-1.pdf]

**A**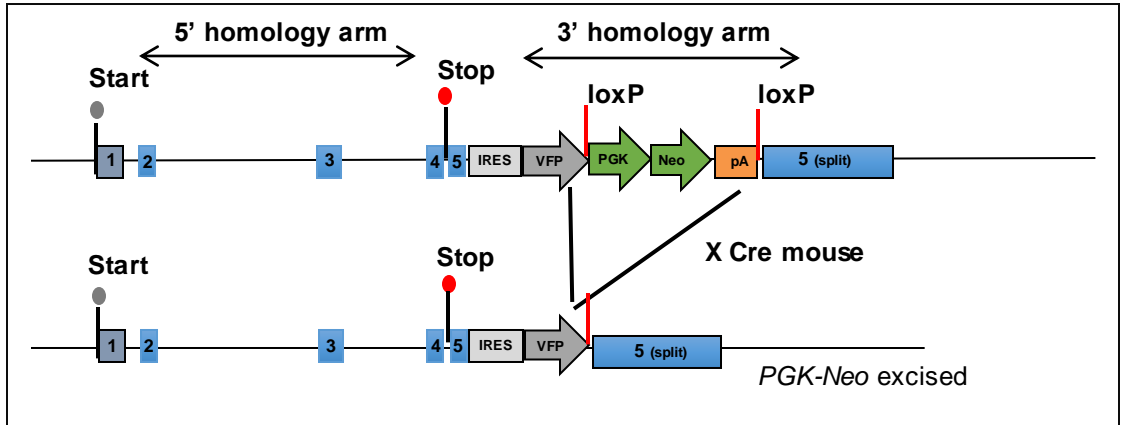**B**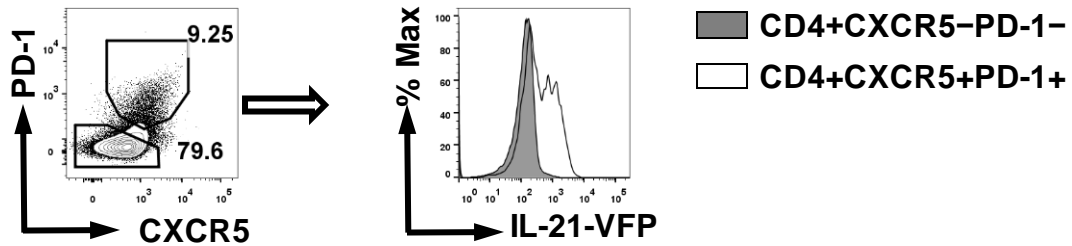

**Supplemental Figure 1. A.** IL21-VFP reporter construct design. An IRES-VFP cassette was inserted into non-coding exon 5 of the *Il21* gene along with a *Neo<sup>R</sup>* selection cassette flanked by loxP sites. The *Neo<sup>R</sup>* cassette was excised by cre-mediated deletion resulting in mice containing the IRES-VFP reporter. **B.** IL-21-VFP expression in CD4<sup>+</sup>CXCR5<sup>+</sup>PD-1<sup>+</sup> gated Tfh and CD4<sup>+</sup>CXCR5<sup>+</sup>PD-1<sup>-</sup> gated non-Tfh cells from a B6.IL21VFP spleen.
